# Supplementary material
Source: PubMed Central journal article supplement (PMC4203622)
Supplement: supp_140289_care-straus-1-at.pdf [file supp_140289_care-straus-1-at.pdf]

**Appendix 1 (as supplied by the authors):** MEDLINE search strategy

1 "Continuity of Patient Care"/ [ QI strategies ]  
 2 Case Management/  
 3 Disease Management/  
 4 "Delivery of Health Care, Integrated"/  
 5 Progressive Patient Care/  
 6 "Patient-Centered Care"/  
 7 "Patient Care Planning"/  
 8 (case adj coordination).tw.  
 9 (case adj co-ordination).tw.  
 10 (case adj management).tw.  
 11 (care adj management).tw.  
 12 (coordinat\$ adj1 care).tw.  
 13 (co-ordinat\$ adj1 care).tw.  
 14 (continu\$ adj1 care).tw.  
 15 "continuity of care".tw.  
 16 comanag\$.tw.  
 17 co-manag\$.tw.  
 18 (care adj3 aftercare).tw.  
 19 (care adj3 after-care).tw.  
 20 (care adj3 collaborat\$).tw.  
 21 (care adj3 cooperat\$).tw.  
 22 (care adj3 co-operat\$).tw.  
 23 (care adj3 interinstitution\$).tw.  
 24 (care adj3 inter-institution\$).tw.  
 25 (care adj3 progressive).tw.  
 26 (care adj3 shared).tw.  
 27 (care adj3 transition\$).tw.  
 28 (disease adj management).tw.  
 29 (disconnect\$ adj2 care).tw.  
 30 "discontinuity of care".tw.  
 31 discoordinat\$.tw.  
 32 disco-ordinat\$.tw.  
 33 (fragment\$ adj care).tw.  
 34 (gap? adj2 care).tw.  
 35 handover\$.tw.  
 36 (hand adj over\$).tw.  
 37 (harmon\$ adj care).tw.  
 38 (integrat\$ adj2 care).tw.  
 39 (lia?son adj service?).tw.  
 40 "patient care plan\$".tw.  
 41 ("patient centred" adj2 care).tw.  
 42 ("patient centered" adj2 care).tw.  
 43 (shared adj care).tw.  
 44 (seamless adj care).tw.  
 45 (synchron\$ adj2 care).tw.  
 46 (transition\$ adj care).tw.  
 47 (uncoordinat\$ adj care).tw.  
 48 (unco-ordinat\$ adj care).tw.  
 49 Medical Records Systems, Computerized/ [ clinical information systems ]  
 50 "clinical information system?".tw.  
 51 "clinical data system?".tw.  
 52 "information retrieval system?".tw.  
 53 "ancillary information system?".tw.  
 54 Decision Support Techniques/ [ decision support ]  
 55 Decision Support Systems, Clinical/  
 56 Decision-Making Computer Assisted/  
 57 "computer\$ decision making".tw. (  
 58 (decision\$ adj2 support\$).tw.  
 59 (decision\$ adj2 aid\$).tw.  
 60 (decision\$ adj2 tool\$).tw.  
 61 (decision\$ adj2 instrument\$).tw.  
 62 (decision\$ adj2 technolog\$).tw.  
 63 (decision\$ adj2 technique\$).tw.  
 64 (decision\$ adj2 system\$).tw.  
 65 (decision\$ adj2 program\$).tw.

66 (decision\$ adj2 algorithm\$.tw.  
 67 (decision\$ adj2 process\$.tw.  
 68 (decision\$ adj2 method\$.tw.  
 69 (decision\$ adj material\$.tw.  
 70 (decision\$ adj2 counsel\$.tw.  
 71 (decision\$ adj2 guid\$.tw.  
 72 (decision\$ adj board).tw.  
 73 (interacti\$ adj3 tool\$.tw.  
 74 "risk communication tool\$.tw.  
 75 interprofession\$.tw. [ team changes ]  
 76 inter-profession\$.tw.  
 77 interdisciplin\$.tw.  
 78 inter-disciplin\$.tw.  
 79 interoccupation\$.tw.  
 80 inter-occupation\$.tw.  
 81 interdepartment\$.tw.  
 82 inter-department\$.tw.  
 83 Interprofessional Relations/  
 84 team\$.tw.  
 85 multiprofession\$.tw.  
 86 multi-profession\$.tw.  
 87 multidisciplin\$.tw.  
 88 multi-disciplin\$.tw.  
 89 multioccupation\$.tw.  
 90 multi-occupation\$.tw.  
 91 or/1-90  
 92 Health Services Misuse/ [ frequent users ]  
 93 Utilization Review/  
 94 (abnormal adj3 use\$.tw.  
 95 (abnormal adj3 utiliz\$.tw.  
 96 (abnormal adj3 utilis\$.tw.  
 97 (abnormal adj3 visit\$.tw.  
 98 (elevated adj3 use\$.tw.  
 99 (elevated adj3 utiliz\$.tw.  
 100 (elevated adj3 utilis\$.tw.  
 101 (elevated adj3 visit\$.tw.  
 102 (excessive\$ adj3 utiliz\$.tw.  
 103 (excessive\$ adj3 utilis\$.tw.  
 104 (excessive\$ adj3 visit\$.tw.  
 105 (frequent\$ adj3 use\$.tw.  
 106 (frequent\$ adj3 flyer\$.tw.  
 107 (frequent\$ adj3 attend\$.tw.  
 108 (frequent\$ adj3 utiliz\$.tw.  
 109 (frequent\$ adj3 utilis\$.tw.  
 110 (frequent\$ adj visit\$.tw.  
 111 (heavy adj3 use\$.tw.  
 112 (heavy adj3 attend\$.tw.  
 113 (heavy adj3 utiliz\$.tw.  
 114 (heavy adj3 utilis\$.tw. (  
 115 (high adj3 use\$.tw.  
 116 (high adj3 attend\$.tw.  
 117 (high adj3 utiliz\$.tw.  
 118 (high adj3 utilis\$.tw.  
 119 (inappropriate adj3 utiliz\$.tw.  
 120 (inappropriate adj3 utilis\$.tw.  
 121 (inappropriate adj3 visit\$.tw.  
 122 (increase\$ adj3 utiliz\$.tw.  
 123 (increase\$ adj3 utilis\$.tw.  
 124 (increase\$ adj3 visit\$.tw.  
 125 "health service? abuse\$.tw.  
 126 hyperuse\$.tw.  
 127 hyper-use\$.tw.  
 128 misuse\$.tw.  
 129 mis-use\$.tw.  
 130 overuse\$.tw.  
 131 over-use\$.tw.  
 132 overutilis\$.tw.  
 133 over-utilis\$.tw.

134 overutiliz\$.tw.  
135 over-utiliz\$.tw.  
136 repeater\$.tw.  
137 (return adj visit\$).tw.  
138 (repeat\$ adj visit\$).tw.  
139 recidivis\$.tw.  
140 (revolving adj door?).tw.  
141 (unnecessary adj use\$).tw.  
142 (unnecessary adj utiliz\$).tw.  
143 (unnecessary adj utilis\$).tw.  
144 (unnecessary adj visit\$).tw.  
145 (utili?ation adj review?).tw.  
146 or/92-145  
147 91 and 146  
148 adult.mp. [ Adult filter – validated, highly sensitive ]  
149 Middle Aged/  
150 age\$.tw.  
151 or/148-150  
152 exp Adult/ [ Geriatric filter - validated, highly sensitive ]  
153 or/151-152  
154 147 and 153  
155 exp Animals/ not (exp Animals/ and Humans/)  
156 154 not 155
