# Supplementary material
Source: PubMed Central journal article supplement (PMC4203622)
Supplement: supp_140289_care-straus-2-at.pdf [file supp_140289_care-straus-2-at.pdf]

| <b>Appendix 2 (as supplied by the authors): Additional study and patient characteristics</b> |                      |                                |                  |                                                                                                                  |                                |                                     |                                       |
|----------------------------------------------------------------------------------------------|----------------------|--------------------------------|------------------|------------------------------------------------------------------------------------------------------------------|--------------------------------|-------------------------------------|---------------------------------------|
| <b>Study</b>                                                                                 | <b># of Patients</b> | <b>Institution, # of Sites</b> | <b>Location</b>  | <b>Outcomes</b>                                                                                                  | <b>Age category, % female</b>  | <b>Frequent user classification</b> | <b>Duration of follow up (months)</b> |
| Botha 2014 (1)<br>(CR: Botha 2010 (37))                                                      | 56                   | Hospital,<br>Single-Site       | Urban            | # of hospitalizations,<br>Mean hospitalizations,<br>Length of stay                                               | Adults (excluding elderly), 27 | Severe                              | 36                                    |
| Burns 2014 (2)                                                                               | 423                  | Clinic,<br>Multi-Site          | Urban            | # of ED visits,<br># of hospitalizations,<br># of clinic visits                                                  | Adults, 52                     | At Risk                             | 1                                     |
| Gellis 2014 (3)<br>(CR: Gellis 2012 (38))                                                    | 94                   | Hospital,<br>Single-Site       | Urban            | Mean ED visits,<br>Length of stay                                                                                | Elderly, 66                    | Moderate                            | 12                                    |
| Ruchlewska 2014 (4)                                                                          | 143                  | Clinic,<br>Multi-Site          | Urban            | # of ED visits,<br># of hospitalizations                                                                         | Adults (excluding elderly), 34 | Low                                 | 18                                    |
| Puschner 2011 (5)                                                                            | 491                  | Hospital,<br>Multi-Site        | Urban &<br>Rural | # of hospitalizations,<br>Mean hospitalizations,<br># of clinic visits,<br>Mean clinic visits,<br>Length of stay | Adults (excluding elderly), 48 | Low                                 | 18                                    |
| Courtney 2009 (6)                                                                            | 122                  | Hospital,<br>Single-Site       | Urban            | # of ED visits,<br># of hospitalizations,<br># of clinic visits                                                  | Elderly, 62                    | At Risk                             | 6                                     |
| Killaspy 2009 (7)<br>(CR: Killaspy 2006 (39))                                                | 237                  | Hospital,<br>Multi-Site        | Urban            | Mean hospitalizations,<br>Length of stay                                                                         | Adults (excluding elderly), 42 | Severe                              | 36                                    |
| Koehler 2009 (8)                                                                             | 41                   | Hospital,<br>Single-Site       | Urban            | # of ED visits,<br># of hospitalizations,<br>Length of stay                                                      | Elderly, 73                    | At Risk                             | 2                                     |
| Bellon 2008 (9)                                                                              | 137                  | Clinic,<br>Single-Site         | NR               | Mean clinic visits                                                                                               | Adults, 54                     | Severe                              | 15                                    |
| Lichtenberg 2008 (10)                                                                        | 217                  | Hospital,<br>Multi-Site        | NR               | # of hospitalizations,<br>Mean hospitalizations,<br>Length of stay                                               | Adults (excluding elderly), 41 | Moderate                            | 12                                    |

| <b>Appendix 2 (continued)</b>                                       |                      |                                |                 |                                                                                                  |                                |                                     |                                       |
|---------------------------------------------------------------------|----------------------|--------------------------------|-----------------|--------------------------------------------------------------------------------------------------|--------------------------------|-------------------------------------|---------------------------------------|
| <b>Study</b>                                                        | <b># of Patients</b> | <b>Institution, # of Sites</b> | <b>Location</b> | <b>Outcomes</b>                                                                                  | <b>Age category, % female</b>  | <b>Frequent user classification</b> | <b>Duration of follow up (months)</b> |
| Shumway 2008 (11)                                                   | 252                  | Hospital, Single-Site          | Urban           | Mean ED visits, Mean hospitalizations, Mean clinic visits, Length of stay                        | Adults, 25                     | Severe                              | 24                                    |
| Rivera 2007 (12)                                                    | 133                  | Hospital, Single-Site          | Urban           | Mean clinic visits, Length of stay                                                               | Adults, 49                     | Low                                 | 12                                    |
| Schreuders 2007 (13) (CRs: Schreuders 2005 (40), Bosmans 2012 (41)) | 175                  | NR, Multi-Site                 | Urban           | Mean clinic visits                                                                               | Adults, 71                     | Severe                              | 3                                     |
| Sledge 2006 (14)                                                    | 96                   | Hospital, Single-Site          | Urban           | Mean ED visits, Mean hospitalizations, Mean clinic visits                                        | Adults, 67                     | Low                                 | 12                                    |
| Scott 2004 (15) (CR: Coleman 2001 (42))                             | 294                  | NR, Single-Site                | Urban           | # of ED visits, Mean ED visits, Mean hospitalizations, Mean clinic visits                        | Elderly, 59                    | Severe                              | 24                                    |
| Castro 2003 (16)                                                    | 96                   | Hospital, Single-Site          | Urban           | Mean ED visits, # of hospitalizations, Mean hospitalizations, Mean clinic visits, Length of stay | Adults (excluding elderly), 40 | Low                                 | 12                                    |
| Laramée 2003 (17)                                                   | 256                  | Hospital, Single-Site          | Unclear         | # of hospitalizations, Length of stay                                                            | Adults, 46                     | At Risk                             | 2                                     |
| Harrison-Read 2002 (18)                                             | 193                  | Clinic, Single-Site            | Urban           | Mean clinic visits, Length of stay                                                               | Adults (excluding elderly), 47 | Severe                              | 24                                    |
| Kasper 2002 (19)                                                    | 200                  | Hospital/Clinic, Multi-Site    | Urban           | # of hospitalizations, Mean hospitalizations, Length of stay                                     | Elderly, 40                    | At Risk                             | 6                                     |
| Katzelnick 2000 (20) (CR: Simon 2001 (43))                          | 380                  | Clinic, Multi-Site             | Urban           | Mean hospitalizations, Mean clinic visits                                                        | Adults (excluding elderly), 77 | Severe                              | 12                                    |

| <b>Appendix 2 (continued)</b>                                                            |                      |                                |                 |                                                                                                  |                                |                                     |                                       |
|------------------------------------------------------------------------------------------|----------------------|--------------------------------|-----------------|--------------------------------------------------------------------------------------------------|--------------------------------|-------------------------------------|---------------------------------------|
| <b>Study</b>                                                                             | <b># of Patients</b> | <b>Institution, # of Sites</b> | <b>Location</b> | <b>Outcomes</b>                                                                                  | <b>Age category, % female</b>  | <b>Frequent user classification</b> | <b>Duration of follow up (months)</b> |
| Burns 1999 (21) (CRs: UK700 (44), Burns 2000 (45), Burns 2002 (46), Hassiotis 2001 (47)) | 708                  | Hospital, Multi-Sites          | Urban           | # of hospitalizations, Mean hospitalizations, Length of stay                                     | Adults (excluding elderly), 43 | Low                                 | 24                                    |
| Coleman 1999 (22)†                                                                       | 169                  | Clinic, Single-Site            | Urban           | Mean ED visits, Mean hospitalizations, # of clinic visits, Length of stay                        | Elderly, 49                    | Severe                              | 24                                    |
| Gagnon 1999 (23)                                                                         | 427                  | Hospital, Multi-Site           | Urban           | Mean ED visits, Mean hospitalizations, Length of stay                                            | Elderly, 58                    | At Risk                             | 10                                    |
| Salkever 1999 (24)                                                                       | 173                  | Clinic, Multi-Site             | Urban           | # of hospitalizations Mean hospitalizations, Length of stay                                      | Adults (excluding elderly), 46 | At Risk                             | 18                                    |
| Essock 1998 (25) (CR: Essock 2006 (48))                                                  | 262                  | NR, Multi-Site                 | NR              | Length of stay                                                                                   | Adults, 36                     | Severe                              | 18                                    |
| Stewart 1998 (26)                                                                        | 97                   | Hospital, Single-Site          | Rural           | # of hospitalizations                                                                            | Adults, 52                     | At Risk                             | 6                                     |
| Beck 1997 (27)                                                                           | 321                  | NR, Single-Site                | Urban           | Mean ED visits, # of hospitalizations, Mean hospitalizations, Mean clinic visits, Length of stay | Elderly, 67                    | Severe                              | 12                                    |
| Spillane 1997 (28)                                                                       | 70                   | Hospital, Multi-Site           | Urban           | # of clinic visits, Mean clinic visits                                                           | Adults, 52                     | Severe                              | 12                                    |
| Lafave 1996 (29)                                                                         | 65                   | Hospital, Single-Site          | Urban           | # of hospitalizations Length of stay                                                             | Adults (excluding elderly), NR | Severe                              | 12                                    |

| <b>Appendix 2 (continued)</b>                                                           |                      |                                |                 |                                                              |                                |                                     |                                       |
|-----------------------------------------------------------------------------------------|----------------------|--------------------------------|-----------------|--------------------------------------------------------------|--------------------------------|-------------------------------------|---------------------------------------|
| <b>Study</b>                                                                            | <b># of Patients</b> | <b>Institution, # of Sites</b> | <b>Location</b> | <b>Outcomes</b>                                              | <b>Age category, % female</b>  | <b>Frequent user classification</b> | <b>Duration of follow up (months)</b> |
| Quinlivan 1995 (30)                                                                     | 60                   | Hospital, Multi-Site           | Urban           | Length of stay                                               | Adults, 57                     | Severe                              | 24                                    |
| Rich 1995 (31) (CR: Rich 1996 (49))                                                     | 282                  | Hospital, Single-Site          | Urban           | # of hospitalizations<br>Length of stay                      | Elderly, 64                    | At Risk                             | 3                                     |
| Rosenheck 1995 (32) (CR: Rosenheck 1998 (50))                                           | 60                   | Hospital, Multi-Site           | NR              | Length of stay                                               | Adults, NR                     | Severe                              | 24                                    |
| Muijen 1994 (33)                                                                        | 82                   | Hospital, Single-Site          | Urban           | Mean hospitalizations, Mean clinic visits,<br>Length of stay | Adults (excluding elderly), 44 | Low                                 | 18                                    |
| Rich 1993 (34)                                                                          | 98                   | Hospital, Single-Site          | Urban           | # of hospitalizations<br>Length of stay                      | Elderly, 59                    | At Risk                             | 3                                     |
| Bond 1988 (35)                                                                          | 167                  | Hospital, Multi-Site           | Urban           | Length of stay                                               | Adults, 38                     | At Risk                             | 6                                     |
| Franklin 1987 (36)                                                                      | 417                  | Hospital, Multi-Site           | NR              | # of ED visits,<br># of hospitalizations,<br>Length of stay  | Adults, 51                     | Low                                 | 12                                    |
| <b>Abbreviations:</b> CR, Companion report; ED, Emergency department; NR, Not reported. |                      |                                |                 |                                                              |                                |                                     |                                       |

## References

1. Botha UA, Koen L, Galal U, et al. The rise of assertive community interventions in South Africa: a randomized control trial assessing the impact of a modified assertive intervention on readmission rates; a three year follow-up. *BMC Psychiatry* 2014;14:56.
2. Burns ME, Galbraith AA, Ross-Degnan D, et al. Feasibility and evaluation of a pilot community health worker intervention to reduce hospital readmissions. *Int J Qual Health Care*. 2014; Apr. 16. [Epub ahead of print].
3. Gellis ZD, Kenaley BL, Ten Have T. Integrated telehealth care for chronic illness and depression in geriatric home care patients: the Integrated Telehealth Education and Activation of Mood (I-TEAM) study. *J Am Geriatr Soc* 2014;62:889-95.
4. Ruchlewska A, Wierdsma AI, Kamperman AM, et al. Effect of crisis plans on admissions and emergency visits: a randomized controlled trial. *PLoS ONE* 2014;9:e91882.
5. Puschner B, Steffen S, Volker KA, et al. Needs-oriented discharge planning for high utilisers of psychiatric services: multicentre randomised controlled trial. *Epidemiol Psychiatr Sci* 2011;20:181-92.
6. Courtney M, Edwards H, Chang A, et al. Fewer emergency readmissions and better quality of life for older adults at risk of hospital readmission: a randomized controlled trial to determine the effectiveness of a 24-week exercise and telephone follow-up program. *J Am Geriatr Soc* 2009;57:395-402.
7. Killaspy H, Kingett S, Bebbington P, et al. Randomised evaluation of assertive community treatment: 3-year outcomes. *Br J Psychiatry* 2009;195:81-2.
8. Koehler BE, Richter KM, Youngblood L, et al. Reduction of 30-day postdischarge hospital readmission or emergency department (ED) visit rates in high-risk elderly medical patients through delivery of a targeted care bundle. *J Hosp Med* 2009;4:211-8.
9. Bellón JA, Rodriguez-Bayon A, de Dios Luna J, et al. Successful GP intervention with frequent attenders in primary care: randomised controlled trial. *Br J Gen Pract* 2008;58:324-30.
10. Lichtenberg P, Levinson D, Sharshevsky Y, et al. Clinical case management of revolving door patients — a semi-randomized study. *Acta Psychiatr Scand* 2008;117:449-54.
11. Shumway M, Boccellari A, O'Brien K, et al. Cost-effectiveness of clinical case management for ED frequent users: results of a randomized trial. *Am J Emerg Med* 2008;26:155-64.
12. Rivera JJ, Sullivan AM, Valenti SS. Adding consumer-providers to intensive case management: Does it improve outcome? *Psychiatr Serv* 2007;58:802-9.
13. Schreuders B, van Marwijk H, Smit J, et al. Primary care patients with mental health problems: outcome of a randomised clinical trial. *Br J Gen Pract* 2007;57:886-91.
14. Sledge WH, Brown KE, Levine JM, et al. A randomized trial of primary intensive care to reduce hospital admissions in patients with high utilization of inpatient services. *Dis Manage* 2006;9:328-38.

15. Scott JC, Conner DA, Venohr I, et al. Effectiveness of a group outpatient visit model for chronically ill older health maintenance organization members: a 2-year randomized trial of the cooperative health care clinic. *J Am Geriatr Soc* 2004;52:1463-70.
16. Castro M, Zimmermann NA, Crocker S, et al. Asthma intervention program prevents readmissions in high healthcare users. *Am J Respir Crit Care Med* 2003;168:1095-9.
17. Laramee AS, Levinsky SK, Sargent J, et al. Case management in a heterogeneous congestive heart failure population: a randomized controlled trial. *Arch Intern Med* 2003;163:809-17.
18. Harrison-Read P, Lucas B, Tyrer P, et al. Heavy users of acute psychiatric beds: randomized controlled trial of enhanced community management in an outer London borough. *Psychol Med* 2002;32:403-16.
19. Kasper EK, Gerstenblith G, Hefter G, et al. A randomized trial of the efficacy of multidisciplinary care in heart failure outpatients at high risk of hospital readmission. *J Am Coll Cardiol* 2002;39:471-80.
20. Katzelnick DJ, Simon GE, Pearson SD, et al. Randomized trial of a depression management program in high utilizers of medical care. *Arch Fam Med* 2000;9:345-51.
21. Burns T, Creed F, Fahy T, et al. Intensive versus standard case management for severe psychotic illness: a randomised trial. UK 700 Group. *Lancet* 1999;353:2185-9.
22. Coleman EA, Grothaus LC, Sandhu N, et al. Chronic care clinics: a randomized controlled trial of a new model of primary care for frail older adults. *J Am Geriatr Soc* 1999;47:775-83.
23. Gagnon AJ, Schein C, McVey L, et al. Randomized controlled trial of nurse case management of frail older people. *J Am Geriatr Soc* 1999;47:1118-24.
24. Salkever D, Domino ME, Burns BJ, et al. Assertive community treatment for people with severe mental illness: the effect on hospital use and costs. *Health Serv Res* 1999;34:577-601.
25. Essock SM, Frisman LK, Kontos NJ. Cost-effectiveness of assertive community treatment teams. *Am J Orthopsychiatry* 1998;68:179-90.
26. Stewart S, Pearson S, Horowitz JD. Effects of a home-based intervention among patients with congestive heart failure discharged from acute hospital care. *Arch Intern Med* 1998;158:1067-72.
27. Beck A, Scott J, Williams P, et al. A randomized trial of group outpatient visits for chronically ill older HMO members: the Cooperative Health Care Clinic. *J Am Geriatr Soc* 1997;45:543-9.
28. Spillane LL, Lumb EW, Cobaugh DJ, et al. Frequent users of the emergency department: Can we intervene? *Acad Emerg Med* 1997;4:574-80.
29. Lafave HG, de Souza HR, Gerber GJ. Assertive community treatment of severe mental illness: a Canadian experience. *Psychiatr Serv* 1996;47:757-9.

30. Quinlivan R, Hough R, Crowell A, et al. Service utilization and costs of care for severely mentally ill clients in an intensive case management program. *Psychiatr Serv* 1995;46:365-71.
31. Rich MW, Beckham V, Wittenberg C, et al. A multidisciplinary intervention to prevent the readmission of elderly patients with congestive heart failure. *N Engl J Med* 1995;333:1190-5.
32. Rosenheck R, Neale M, Leaf P, et al. Multisite experimental cost study of intensive psychiatric community care. *Schizophr Bull* 1995;21:129-40.
33. Muijen M, Cooney M, Strathdee G, et al. Community psychiatric nurse teams: intensive support versus generic care. *Br J Psychiatry* 1994;165:211-7.
34. Rich MW, Vinson JM, Sperry JC, et al. Prevention of readmission in elderly patients with congestive heart failure: results of a prospective, randomized pilot study. *J Gen Intern Med* 1993;8:585-90.
35. Bond GR, Miller LD, Krumwied RD, et al. Assertive case management in three CMHCs: a controlled study. *Hosp Community Psychiatry* 1988;39:411-8.
36. Franklin JL, Solovitz B, Mason M, et al. An evaluation of case management. *Am J Public Health* 1987;77:674-8.
37. Botha UA, Koen L, Joska JA, et al. Assessing the efficacy of a modified assertive community-based treatment programme in a developing country. *BMC Psychiatry* 2010;10:73.
38. Gellis ZD, Kenaley B, McGinty J, et al. Outcomes of a telehealth intervention for homebound older adults with heart or chronic respiratory failure: a randomized controlled trial. *Gerontologist* 2012;52:541-52.
39. Killaspy H, Bebbington P, Blizard R, et al. The REACT study: randomised evaluation of assertive community treatment in north London. *BMJ* 2006;332:815-20.
40. Schreuders B, van Oppen P, van Marwijk HW, et al. Frequent attenders in general practice: problem solving treatment provided by nurses. *BMC Fam Pract* 2005;6:42.
41. Bosmans JE, Schreuders B, van Marwijk HW, et al. Cost-effectiveness of problem-solving treatment in comparison with usual care for primary care patients with mental health problems: a randomized trial. *BMC Fam Pract* 2012;13:98.
42. Coleman EA, Eilertsen TB, Kramer AM, et al. Reducing emergency visits in older adults with chronic illness. a randomized, controlled trial of group visits. *Effect Clin Pract* 2001;4:49-57.
43. Simon GE, Manning WG, Katzelnick DJ, et al. Cost-effectiveness of systematic depression treatment for high utilizers of general medical care. *Arch Gen Psychiatry* 2001;58:181-7.
44. Cost-effectiveness of intensive v. standard case management for severe psychotic illness. UK700 case management trial. UK700 Group. *Br J Psychiatry* 2000;176:537-43.

45. Burns T, Fiander M, Kent A, et al. Effects of case-load size on the process of care of patients with severe psychotic illness. Report from the UK700 trial. *Br J Psychiatry* 2000;177:427-33.
46. Burns T, White I, Byford S, et al. Exposure to case management: relationships to patient characteristics and outcome. Report from the UK700 trial. *Br J Psychiatry* 2002;181:236-41.
47. Hassiotis A, Ukoumunne OC, Byford S, et al. Intellectual functioning and outcome of patients with severe psychotic illness randomised to intensive case management. Report from the UK700 trial. *Br J Psychiatry* 2001;178:166-71.
48. Essock SM, Mueser KT, Drake RE, et al. Comparison of ACT and standard case management for delivering integrated treatment for co-occurring disorders. *Psychiatr Serv* 2006;57:185-96.
49. Rich MW, Gray DB, Beckham V, et al. Effect of a multidisciplinary intervention on medication compliance in elderly patients with congestive heart failure. *Am J Med* 1996;101:270-6.
50. Rosenheck RA, Neale MS. Cost-effectiveness of intensive psychiatric community care for high users of inpatient services. *Arch Gen Psychiatry* 1998;55:459-66.
