# Supplementary material
Source: PubMed Central journal article supplement (PMC4203622)
Supplement: supp_140289_care-straus-3-at.pdf [file supp_140289_care-straus-3-at.pdf]

| <b>Appendix 3 (as supplied by the authors):</b> Details of the quality improvement strategies examined in the included studies |                    |                 |                  |                |                                                                                                               |                                                                                                                       |                                                                          |                                     |
|--------------------------------------------------------------------------------------------------------------------------------|--------------------|-----------------|------------------|----------------|---------------------------------------------------------------------------------------------------------------|-----------------------------------------------------------------------------------------------------------------------|--------------------------------------------------------------------------|-------------------------------------|
| <b>Study</b>                                                                                                                   | <b>QI Strategy</b> | <b>Outreach</b> | <b>Navigator</b> | <b>Control</b> | <b>Personnel Providing QI Delivery</b>                                                                        | <b>Frequency of Treatment</b>                                                                                         | <b>Session Duration, hours</b>                                           | <b>Duration of Intervention, mo</b> |
| Botha 2014 (1)<br>(CR: Botha 2010 (37))                                                                                        | CM, TC             | Yes             | Unclear          | Weak CM        | Psychiatrist, social worker, psychiatric nurse, with access to psychologist, occupational therapist as needed | Every 2 wk, as needed                                                                                                 | NR                                                                       | 12                                  |
| Burns 2014 (2)                                                                                                                 | CM, SM, PE         | No              | Yes              | Usual care     | Community health worker                                                                                       | 1 or more in-hospital visits, weekly calls                                                                            | NR                                                                       | 1                                   |
| Gellis 2014 (3)<br>(CR: Gellis 2012 (38))                                                                                      | FR, CM, SM, PE, CE | Yes             | Yes              | Usual care     | Three telehealth trained nurses                                                                               | daily telemonitoring, 8 weekly sessions of PST                                                                        | PST session–35 minutes                                                   | 3                                   |
| Ruchlewska 2014 (4)                                                                                                            | SM                 | No              | No               | Usual care     | Clinicians (most psychiatric nurses)                                                                          | NR                                                                                                                    | NR                                                                       | NR                                  |
| Puschner 2011 (5)                                                                                                              | TC, SM             | Unclear         | Unclear          | Usual care     | Clinician, intervention worker, research staff                                                                | Before discharge, 3 mo after discharge                                                                                | NR                                                                       | 3                                   |
| Courtney 2009 (6)                                                                                                              | CM, TC, SM, PE     | Yes             | Unclear          | Usual care     | Nurses, physiotherapists                                                                                      | Daily in hospital, home visit within 48 hrs of discharge, weekly calls for 4 weeks, monthly calls for 5 mo, as needed | Walking: 3-10 min 2-4x/week; strengthening: Contractions were held for 3 | 6                                   |
| Killaspy 2009 (7)<br>(CR: Killaspy 2006 (39))                                                                                  | CM, TC             | Yes             | Unclear          | Weak CM        | Multidisciplinary team                                                                                        | Mean 5.4 contacts/mo                                                                                                  | NR                                                                       | 18                                  |

| <b>Appendix 3 (continued)</b>                                          |                          |                 |                  |                |                                                                                                                                                                                    |                                                          |                                                          |                                     |
|------------------------------------------------------------------------|--------------------------|-----------------|------------------|----------------|------------------------------------------------------------------------------------------------------------------------------------------------------------------------------------|----------------------------------------------------------|----------------------------------------------------------|-------------------------------------|
| <b>Study</b>                                                           | <b>QI Strategy</b>       | <b>Outreach</b> | <b>Navigator</b> | <b>Control</b> | <b>Personnel Providing QI Delivery</b>                                                                                                                                             | <b>Frequency of Treatment</b>                            | <b>Session Duration, hours</b>                           | <b>Duration of Intervention, mo</b> |
| Koehler 2009 (8)                                                       | TC, CM<br>PE, SM,<br>CIS | No              | No               | PE             | 3 care coordinators (highly experienced with advanced nursing certifications), clinical pharmacists (upper-level pharmacy residents completing their inpatient clinical rotations) | Daily in-hospital, upon discharge, 1 week post-discharge | NR                                                       | 0.25                                |
| Bellon 2008 (9)                                                        | SM,<br>CQI, CE           | Yes             | Unclear          | Usual care     | 3 trained and experienced physicians, specialized nurse case manager                                                                                                               | NR                                                       | NR                                                       | 3                                   |
| Lichtenberg 2008 (10)                                                  | CM, TC,<br>SM            | Yes             | Yes              | Usual care     | Case managers: social workers, psychologists, occupational therapists, psychiatric nurses with at least 2 years' experience                                                        | NR                                                       | NA                                                       | 12                                  |
| Shumway 2008 (11)                                                      | CM                       | Yes             | Yes              | Usual care     | Master's-level social worker                                                                                                                                                       | As needed                                                | NR                                                       | 24                                  |
| Rivera 2007 (12)                                                       | CM                       | Yes             | Unclear          | Weak CM        | Social workers, program directors                                                                                                                                                  | Ongoing, as needed                                       | NR                                                       | 12                                  |
| Schreuders 2007 (13)<br>(CRs: Schreuders 2005 (40), Bosmans 2012 (41)) | CM, SM                   | Unclear         | Unclear          | Usual care     | 12 community nurses from a mental health care institution                                                                                                                          | 4-6 sessions                                             | Max.1 for first session, max 0.5 for subsequent sessions | 3                                   |
| Sledge 2006 (14)                                                       | CM, TC,<br>SM            | Yes             | Yes              | Usual care     | Psychiatric nurse                                                                                                                                                                  | As needed, minimum 1 phone call/mo                       | NR                                                       | 12                                  |
| Scott 2004 (15)<br>(CR: Coleman 2001 (42))                             | TC, PE                   | Unclear         | Unclear          | Usual care     | 19 primary care physicians and nurses (with physical therapists, pharmacists, occupational therapists, community resources as needed)                                              | 1/mo                                                     | 1.5                                                      | 24                                  |
| Castro 2003 (16)                                                       | CM, PE,<br>SM            | Yes             | Unclear          | Usual care     | Nurses                                                                                                                                                                             | NR                                                       | NR                                                       | 6                                   |

| <b>Appendix 3 (continued)</b>                 |                    |                 |                  |                 |                                                                                                                                                                                           |                                                                                                                                             |                                |                                     |
|-----------------------------------------------|--------------------|-----------------|------------------|-----------------|-------------------------------------------------------------------------------------------------------------------------------------------------------------------------------------------|---------------------------------------------------------------------------------------------------------------------------------------------|--------------------------------|-------------------------------------|
| <b>Study</b>                                  | <b>QI Strategy</b> | <b>Outreach</b> | <b>Navigator</b> | <b>Control</b>  | <b>Personnel Providing QI Delivery</b>                                                                                                                                                    | <b>Frequency of Treatment</b>                                                                                                               | <b>Session Duration, hours</b> | <b>Duration of Intervention, mo</b> |
| Laramee 2003 (17)                             | CM, TC, PE, SM     | No              | Yes              | Usual care      | Case manager (with master's degree and 18 years experience in critical care and cardiology), consultations from social services, dietary services, physical therapy, occupational therapy | As needed in-hospital, phone call at 1-3 days post-discharge, weekly for 1 mo, then bi-weekly for 2 mos                                     | 5-45 minute phone calls        | 3                                   |
| Harrison-Read 2002 (18)                       | CM, TC, SM         | Yes             | Unclear          | Weak CM         | Social worker, 2 part-time clinical psychologists, specialist registrar psychiatrist, 3 community mental health nurses, occupational therapist who acted as team coordinator              | NR                                                                                                                                          | NR                             | 24                                  |
| Kasper 2002 (19)                              | CM, TC, PE, SM, FI | Yes             | Unclear          | Usual care      | Telephone nurse coordinator, nurse, cardiologist                                                                                                                                          | Nurse calls within 72 hr of discharge, weekly for 1 mo, 2 times in 2 <sup>nd</sup> mo; as needed<br>Cardiologist visit at baseline and 6 mo | NR                             | 6                                   |
| Katzelnick 2000 (20)<br>(CR: Simon 2001 (43)) | CM, PE, CE         | Unclear         | Unclear          | No intervention | Physician and coordinators (with bachelor's or master's degrees and some clinical mental health experience) plus 1 or 2 psychiatrist consultants                                          | Follow-up at 1,3,6, and 10 wk; subsequently 1 visit/10 wk                                                                                   | NR                             | 12                                  |
| Salkever 1999 (21)                            | CM, TC, PE         | Yes             | Unclear          | Weak CM         | Community mental health professionals                                                                                                                                                     | Availability 24 h/d, 7 d/wk                                                                                                                 | NR                             | 18                                  |

| <b>Appendix 3 (continued)</b>                                                            |                    |                 |                  |                |                                                                                                                   |                                                         |                                                                                                     |                                     |
|------------------------------------------------------------------------------------------|--------------------|-----------------|------------------|----------------|-------------------------------------------------------------------------------------------------------------------|---------------------------------------------------------|-----------------------------------------------------------------------------------------------------|-------------------------------------|
| <b>Study</b>                                                                             | <b>QI Strategy</b> | <b>Outreach</b> | <b>Navigator</b> | <b>Control</b> | <b>Personnel Providing QI Delivery</b>                                                                            | <b>Frequency of Treatment</b>                           | <b>Session Duration, hours</b>                                                                      | <b>Duration of Intervention, mo</b> |
| Burns 1999 (22) (CRs: UK700 (44), Burns 2000 (45), Burns 2002 (46), Hassiotis 2001 (47)) | CM                 | Yes             | Unclear          | Weak CM        | Case managers (mainly nurses, but also occupational therapists, mental-health support workers, and psychologists) | As needed                                               | NR                                                                                                  | 24                                  |
| Coleman 1999 (23)                                                                        | TC, SM, CE         | Unclear         | Unclear          | Usual care     | Physicians, nurses, social worker, pharmacist                                                                     | Every 3-4 mo                                            | Extended 30 min with physician and team nurse; 15 min with pharmacist; 45 min self management group | 24                                  |
| Gagnon 1999 (24)                                                                         | CM                 | Yes             | Unclear          | Usual care     | Nurse case manager                                                                                                | 1 phone call/mo; 1 home visit/6 wk; follow-up as needed | NR                                                                                                  | 10                                  |
| Essock 1998 (25) (CR Essock 2006 (48))                                                   | CM, TC             | Yes             | Unclear          | Weak CM        | Physicians, nurses, part-time psychiatrist                                                                        | NR                                                      | NR                                                                                                  | 18                                  |
| Stewart 1998 (26)                                                                        | TC, CM, PE, SM     | Yes             | No               | Usual care     | Nurse, pharmacist                                                                                                 | Before discharge and 1 week post-discharge              | NR                                                                                                  | NR                                  |
| Beck 1997 (27)                                                                           | TC, PE, FR         | Unclear         | Unclear          | Usual care     | Physicians, nurses, psychologist                                                                                  | 1/mo                                                    | 2                                                                                                   | 12                                  |
| Spillane 1997 (28)                                                                       | TC                 | Unclear         | Unclear          | Usual care     | Social worker, psychiatrist, emergency department nurse, primary care provider or clinic nurse                    | As needed                                               | NR                                                                                                  | 12                                  |

| <b>Appendix 3 (continued)</b>                                                                                                                                                                                                                                                                                                                                                                                                                                                       |                    |                 |                  |                |                                                                                                                                          |                                                                                                       |                                |                                     |
|-------------------------------------------------------------------------------------------------------------------------------------------------------------------------------------------------------------------------------------------------------------------------------------------------------------------------------------------------------------------------------------------------------------------------------------------------------------------------------------|--------------------|-----------------|------------------|----------------|------------------------------------------------------------------------------------------------------------------------------------------|-------------------------------------------------------------------------------------------------------|--------------------------------|-------------------------------------|
| <b>Study</b>                                                                                                                                                                                                                                                                                                                                                                                                                                                                        | <b>QI Strategy</b> | <b>Outreach</b> | <b>Navigator</b> | <b>Control</b> | <b>Personnel Providing QI Delivery</b>                                                                                                   | <b>Frequency of Treatment</b>                                                                         | <b>Session Duration, hours</b> | <b>Duration of Intervention, mo</b> |
| Lafave 1996 (29)                                                                                                                                                                                                                                                                                                                                                                                                                                                                    | CM, TC, SM         | Yes             | Unclear          | Usual care     | Psychiatrist, nurses, social workers, vocational counselor, support worker with mental illness                                           | 1/wk to several times daily                                                                           | NR                             | 12                                  |
| Quinlivan 1995 (30)                                                                                                                                                                                                                                                                                                                                                                                                                                                                 | CM                 | Unclear         | Unclear          | Weak CM        | 2 case managers, 2 community living aides                                                                                                | NR                                                                                                    | NR                             | 24                                  |
| Rich 1995 (31) (CR: Rich 1996 (49))                                                                                                                                                                                                                                                                                                                                                                                                                                                 | CM, TC, PE, SM     | Yes             | Unclear          | Usual care     | Study nurse, dietician, social service personnel, geriatric cardiologist                                                                 | NR                                                                                                    | NR                             | 3                                   |
| Rosenheck 1995 (32) (CR: Rosenheck 1998 (50))                                                                                                                                                                                                                                                                                                                                                                                                                                       | CM, TC             | Yes             | Unclear          | Weak CM        | Masters-level nurses, social workers, psychiatrist (occasional)                                                                          | As needed                                                                                             | NR                             | 24                                  |
| Muijen 1994 (33)                                                                                                                                                                                                                                                                                                                                                                                                                                                                    | CM                 | Yes             | Unclear          | Weak CM        | Nurse                                                                                                                                    | Mean 2.9 contacts/mo                                                                                  | NR                             | NR                                  |
| Rich 1993 (34)                                                                                                                                                                                                                                                                                                                                                                                                                                                                      | TC, CM, PE, SM     | Yes             | Unclear          | Usual care     | Cardiovascular nurse, dietician, cardiologist, social worker                                                                             | Daily in hospital, within 48 hours of discharge, 3 times in week 1, as needed (ongoing phone contact) | NR                             | 3                                   |
| Bond 1988 (35)                                                                                                                                                                                                                                                                                                                                                                                                                                                                      | CM                 | Yes             | Unclear          | Weak CM        | Case managers                                                                                                                            | As needed                                                                                             | NR                             | 6                                   |
| Franklin 1987 (36)                                                                                                                                                                                                                                                                                                                                                                                                                                                                  | CM                 | Unclear         | Unclear          | Usual care     | Supervisor, 7 case managers (social work, sociology, psychology, counselling, business administration degrees. mental health experience) | As needed                                                                                             | NR                             | 12                                  |
| <p><b>Abbreviations:</b> AF, Audit and feedback; CE, Clinician education; CIS, Clinical information system; CM, Case management; CQI, Continuous quality improvement; CR, Companion report; DS, Decision support; FI, Financial incentives; FR, Facilitated relay of clinical information; Mo, Month; NR, not reported; PE, Patient education; PR, Patient reminders; PST, Problem-solving treatment; QI, Quality improvement; SM, Self-management; TC, Team changes; Wk, Week.</p> |                    |                 |                  |                |                                                                                                                                          |                                                                                                       |                                |                                     |

## References

1. Botha UA, Koen L, Galal U, et al. The rise of assertive community interventions in South Africa: a randomized control trial assessing the impact of a modified assertive intervention on readmission rates; a three year follow-up. *BMC Psychiatry* 2014;14:56.
2. Burns ME, Galbraith AA, Ross-Degnan D, et al. Feasibility and evaluation of a pilot community health worker intervention to reduce hospital readmissions. *Int J Qual Health Care*. 2014; Apr. 16. [Epub ahead of print].
3. Gellis ZD, Kenaley BL, Ten Have T. Integrated telehealth care for chronic illness and depression in geriatric home care patients: the Integrated Telehealth Education and Activation of Mood (I-TEAM) study. *J Am Geriatr Soc* 2014;62:889-95.
4. Ruchlewska A, Wierdsma AI, Kamperman AM, et al. Effect of crisis plans on admissions and emergency visits: a randomized controlled trial. *PLoS ONE* 2014;9:e91882.
5. Puschner B, Steffen S, Volker KA, et al. Needs-oriented discharge planning for high utilisers of psychiatric services: multicentre randomised controlled trial. *Epidemiol Psychiatr Sci* 2011;20:181-92.
6. Courtney M, Edwards H, Chang A, et al. Fewer emergency readmissions and better quality of life for older adults at risk of hospital readmission: a randomized controlled trial to determine the effectiveness of a 24-week exercise and telephone follow-up program. *J Am Geriatr Soc* 2009;57:395-402.
7. Killaspy H, Kingett S, Bebbington P, et al. Randomised evaluation of assertive community treatment: 3-year outcomes. *Br J Psychiatry* 2009;195:81-2.
8. Koehler BE, Richter KM, Youngblood L, et al. Reduction of 30-day postdischarge hospital readmission or emergency department (ED) visit rates in high-risk elderly medical patients through delivery of a targeted care bundle. *J Hosp Med* 2009;4:211-8.
9. Bellón JA, Rodriguez-Bayon A, de Dios Luna J, et al. Successful GP intervention with frequent attenders in primary care: randomised controlled trial. *Br J Gen Pract* 2008;58:324-30.
10. Lichtenberg P, Levinson D, Sharshevsky Y, et al. Clinical case management of revolving door patients — a semi-randomized study. *Acta Psychiatr Scand* 2008;117:449-54.
11. Shumway M, Boccellari A, O'Brien K, et al. Cost-effectiveness of clinical case management for ED frequent users: results of a randomized trial. *Am J Emerg Med* 2008;26:155-64.
12. Rivera JJ, Sullivan AM, Valenti SS. Adding consumer-providers to intensive case management: Does it improve outcome? *Psychiatr Serv* 2007;58:802-9.
13. Schreuders B, van Marwijk H, Smit J, et al. Primary care patients with mental health problems: outcome of a randomised clinical trial. *Br J Gen Pract* 2007;57:886-91.

14. Sledge WH, Brown KE, Levine JM, et al. A randomized trial of primary intensive care to reduce hospital admissions in patients with high utilization of inpatient services. *Dis Manage* 2006;9:328-38.
15. Scott JC, Conner DA, Venohr I, et al. Effectiveness of a group outpatient visit model for chronically ill older health maintenance organization members: a 2-year randomized trial of the cooperative health care clinic. *J Am Geriatr Soc* 2004;52:1463-70.
16. Castro M, Zimmermann NA, Crocker S, et al. Asthma intervention program prevents readmissions in high healthcare users. *Am J Respir Crit Care Med* 2003;168:1095-9.
17. Laramee AS, Levinsky SK, Sargent J, et al. Case management in a heterogeneous congestive heart failure population: a randomized controlled trial. *Arch Intern Med* 2003;163:809-17.
18. Harrison-Read P, Lucas B, Tyrer P, et al. Heavy users of acute psychiatric beds: randomized controlled trial of enhanced community management in an outer London borough. *Psychol Med* 2002;32:403-16.
19. Kasper EK, Gerstenblith G, Hefter G, et al. A randomized trial of the efficacy of multidisciplinary care in heart failure outpatients at high risk of hospital readmission. *J Am Coll Cardiol* 2002;39:471-80.
20. Katzelnick DJ, Simon GE, Pearson SD, et al. Randomized trial of a depression management program in high utilizers of medical care. *Arch Fam Med* 2000;9:345-51.
21. Salkever D, Domino ME, Burns BJ, et al. Assertive community treatment for people with severe mental illness: the effect on hospital use and costs. *Health Serv Res* 1999;34:577-601.
22. Burns T, Creed F, Fahy T, et al. Intensive versus standard case management for severe psychotic illness: a randomised trial. UK 700 Group. *Lancet* 1999;353:2185-9.
23. Coleman EA, Grothaus LC, Sandhu N, et al. Chronic care clinics: a randomized controlled trial of a new model of primary care for frail older adults. *J Am Geriatr Soc* 1999;47:775-83.
24. Gagnon AJ, Schein C, McVey L, et al. Randomized controlled trial of nurse case management of frail older people. *J Am Geriatr Soc* 1999;47:1118-24.
25. Essock SM, Frisman LK, Kontos NJ. Cost-effectiveness of assertive community treatment teams. *Am J Orthopsychiatry* 1998;68:179-90.
26. Stewart S, Pearson S, Horowitz JD. Effects of a home-based intervention among patients with congestive heart failure discharged from acute hospital care. *Arch Intern Med* 1998;158:1067-72.
27. Beck A, Scott J, Williams P, et al. A randomized trial of group outpatient visits for chronically ill older HMO members: the Cooperative Health Care Clinic. *J Am Geriatr Soc* 1997;45:543-9.
28. Spillane LL, Lumb EW, Cobaugh DJ, et al. Frequent users of the emergency department: Can we intervene? *Acad Emerg Med* 1997;4:574-80.

29. Lafave HG, de Souza HR, Gerber GJ. Assertive community treatment of severe mental illness: a Canadian experience. *Psychiatr Serv* 1996;47:757-9.
30. Quinlivan R, Hough R, Crowell A, et al. Service utilization and costs of care for severely mentally ill clients in an intensive case management program. *Psychiatr Serv* 1995;46:365-71.
31. Rich MW, Beckham V, Wittenberg C, et al. A multidisciplinary intervention to prevent the readmission of elderly patients with congestive heart failure. *N Engl J Med* 1995;333:1190-5.
32. Rosenheck R, Neale M, Leaf P, et al. Multisite experimental cost study of intensive psychiatric community care. *Schizophr Bull* 1995;21:129-40.
33. Muijen M, Cooney M, Strathdee G, et al. Community psychiatric nurse teams: intensive support versus generic care. *Br J Psychiatry* 1994;165:211-7.
34. Rich MW, Vinson JM, Sperry JC, et al. Prevention of readmission in elderly patients with congestive heart failure: results of a prospective, randomized pilot study. *J Gen Intern Med* 1993;8:585-90.
35. Bond GR, Miller LD, Krumwied RD, et al. Assertive case management in three CMHCs: a controlled study. *Hosp Community Psychiatry* 1988;39:411-8.
36. Franklin JL, Solovitz B, Mason M, et al. An evaluation of case management. *Am J Public Health* 1987;77:674-8.
37. Botha UA, Koen L, Joska JA, et al. Assessing the efficacy of a modified assertive community-based treatment programme in a developing country. *BMC Psychiatry* 2010;10:73.
38. Gellis ZD, Kenaley B, McGinty J, et al. Outcomes of a telehealth intervention for homebound older adults with heart or chronic respiratory failure: a randomized controlled trial. *Gerontologist* 2012;52:541-52.
39. Killaspy H, Bebbington P, Blizard R, et al. The REACT study: randomised evaluation of assertive community treatment in north London. *BMJ* 2006;332:815-20.
40. Schreuders B, van Oppen P, van Marwijk HW, et al. Frequent attenders in general practice: problem solving treatment provided by nurses. *BMC Fam Pract* 2005;6:42.
41. Bosmans JE, Schreuders B, van Marwijk HW, et al. Cost-effectiveness of problem-solving treatment in comparison with usual care for primary care patients with mental health problems: a randomized trial. *BMC Fam Pract* 2012;13:98.
42. Coleman EA, Eilertsen TB, Kramer AM, et al. Reducing emergency visits in older adults with chronic illness. a randomized, controlled trial of group visits. *Effect Clin Pract* 2001;4:49-57.
43. Simon GE, Manning WG, Katzelnick DJ, et al. Cost-effectiveness of systematic depression treatment for high utilizers of general medical care. *Arch Gen Psychiatry* 2001;58:181-7.



44. Cost-effectiveness of intensive v. standard case management for severe psychotic illness. UK700 case management trial. UK700 Group. *Br J Psychiatry* 2000;176:537-43.
45. Burns T, Fiander M, Kent A, et al. Effects of case-load size on the process of care of patients with severe psychotic illness. Report from the UK700 trial. *Br J Psychiatry* 2000;177:427-33.
46. Burns T, White I, Byford S, et al. Exposure to case management: relationships to patient characteristics and outcome. Report from the UK700 trial. *Br J Psychiatry* 2002;181:236-41.
47. Hassiotis A, Ukoumunne OC, Byford S, et al. Intellectual functioning and outcome of patients with severe psychotic illness randomised to intensive case management. Report from the UK700 trial. *Br J Psychiatry* 2001;178:166-71.
48. Essock SM, Mueser KT, Drake RE, et al. Comparison of ACT and standard case management for delivering integrated treatment for co-occurring disorders. *Psychiatr Serv* 2006;57:185-96.
49. Rich MW, Gray DB, Beckham V, et al. Effect of a multidisciplinary intervention on medication compliance in elderly patients with congestive heart failure. *Am J Med* 1996;101:270-6.
50. Rosenheck RA, Neale MS. Cost-effectiveness of intensive psychiatric community care for high users of inpatient services. *Arch Gen Psychiatry* 1998;55:459-66.
