# Supplementary material
Source: PubMed Central journal article supplement (PMC4203622)
Supplement: supp_140289_care-straus-6-at.pdf [file supp_140289_care-straus-6-at.pdf]

| <b>Appendix 6 (as supplied by the authors):</b> Meta-analysis results of care coordination quality improvement strategy (number of studies <sup>†</sup> , followed by the parameter estimate and its confidence interval in parentheses) |                                                                                                                                                                                                                                               |                                                                                                                                                                                                                                                     |                                                                                                                                                                                                                                             |                                                                                                                                                                                       |
|------------------------------------------------------------------------------------------------------------------------------------------------------------------------------------------------------------------------------------------|-----------------------------------------------------------------------------------------------------------------------------------------------------------------------------------------------------------------------------------------------|-----------------------------------------------------------------------------------------------------------------------------------------------------------------------------------------------------------------------------------------------------|---------------------------------------------------------------------------------------------------------------------------------------------------------------------------------------------------------------------------------------------|---------------------------------------------------------------------------------------------------------------------------------------------------------------------------------------|
| <b>Quality Improvement Strategy</b>                                                                                                                                                                                                      | <b>Emergency Department Visits</b>                                                                                                                                                                                                            | <b>Hospital Admissions</b>                                                                                                                                                                                                                          | <b>Clinic Visits</b>                                                                                                                                                                                                                        | <b>Length of Stay</b>                                                                                                                                                                 |
| <b>Care Coordination (overall results)</b>                                                                                                                                                                                               | <p>Proportion of patients with visits: N=6 RCTs and 1426 patients, RR = 1.11 (0.65, 1.90), I<sup>2</sup> = 85%</p> <p>Mean number of visits per patient per month: N=7 RCTs and 1580 patients, MD -0.02 (-0.06, 0.03), I<sup>2</sup> = 0%</p> | <p>Proportion of patients with admissions: N=18 RCTs and 4162 patients, RR 0.81 (0.72, 0.91), I<sup>2</sup> = 58%*</p> <p>Mean number of admissions per patient per month: N=12 RCTs and 3247 patients, MD 0.00 (-0.01, 0.01), I<sup>2</sup>=0%</p> | <p>Proportion of patients with visits: N=5 RCTs and 1260 patients, RR 0.86 (0.58, 1.27), I<sup>2</sup>=91%</p> <p>Mean number of visits per patient per month: N=11 RCTs and 2270 patients, MD -0.08 (-0.23, 0.06), I<sup>2</sup> = 65%</p> | <p>Proportion of patients with visits: N/A</p> <p>Mean number of days for admissions per patient per month: N=19 RCTs and 4138 patients, MD -0.09 (-0.26, 0.09), I<sup>2</sup>=0%</p> |
| Case Management                                                                                                                                                                                                                          | <p>Proportion of patients with visits: N=2 RCTs and 530 patients, RR = 1.08 (0.77, 1.38), I<sup>2</sup> = 40%</p> <p>Mean number of visits per patient per month: N=4 RCTs and 871 patients, MD 0.01 (-0.07, 0.09), I<sup>2</sup>=0%</p>      | <p>Proportion of patients with admissions: N=13 RCTs and 2743 patients, RR 0.79 (0.68, 0.91), I<sup>2</sup>=64%*</p> <p>Mean number of admissions per patient per month: N=9 RCTs and 2141 patients, MD 0.00 (-0.00, 0.01), I<sup>2</sup>=0%</p>    | <p>Proportion of patients with visits: N=2 RCTs and 530 patients, RR 0.60 (0.24, 1.45), I<sup>2</sup>=91%</p> <p>Mean number of visits per patient per month: N=7 RCTs and 1027 patients, MD 0.01 (-0.09, 0.11), I<sup>2</sup> = 0%</p>     | <p>Proportion of patients with visits: N/A</p> <p>Mean number of days for admissions per patient per month: N=16 RCTs and 3400 patients, MD -0.06 (-0.26, 0.13), I<sup>2</sup>=0%</p> |
| Team Changes                                                                                                                                                                                                                             | <p>Proportion of patients with visits: N=2 RCTs and 819 patients, RR = 1.33 (0.40, 4.34), I<sup>2</sup> = 94%</p> <p>Mean number of visits per patient per month: N=3 RCTs and 711 patients, MD -0.02 (-0.07, 0.03), I<sup>2</sup>=0%</p>     | <p>Proportion of patients with admissions: N=12 RCTs and 2334 patients, RR 0.77 (0.67, 0.87), I<sup>2</sup>=46%*</p> <p>Mean number of admissions per patient per month: N=7 RCTs and 1712 patients, MD -0.02 (-0.07, 0.02), I<sup>2</sup>=0%</p>   | <p>Proportion of patients with visits: N=4 RCTs and 837 patients, RR 0.83 (0.49, 1.41), I<sup>2</sup>=91%</p> <p>Mean number of visits per patient per month: N=5 RCTs and 1395 patients, MD -0.00 (-0.09, 0.10), I<sup>2</sup>=0%</p>      | <p>Proportion of patients with visits: N/A</p> <p>Mean number of days for admissions per patient per month: N=11 RCTs and 2286 patients, MD -0.25 (-0.66, 0.16), I<sup>2</sup>=0%</p> |

| <b>Appendix 6 (continued)</b>                                                                                                                                                                                                                      |                                                                                                                                                                                                                                       |                                                                                                                                                                                                                                                 |                                                                                                                                                                                                                                            |                                                                                                                                                                                      |
|----------------------------------------------------------------------------------------------------------------------------------------------------------------------------------------------------------------------------------------------------|---------------------------------------------------------------------------------------------------------------------------------------------------------------------------------------------------------------------------------------|-------------------------------------------------------------------------------------------------------------------------------------------------------------------------------------------------------------------------------------------------|--------------------------------------------------------------------------------------------------------------------------------------------------------------------------------------------------------------------------------------------|--------------------------------------------------------------------------------------------------------------------------------------------------------------------------------------|
| <b>Quality Improvement Strategy</b>                                                                                                                                                                                                                | <b>Emergency Department Visits</b>                                                                                                                                                                                                    | <b>Hospital Admissions</b>                                                                                                                                                                                                                      | <b>Clinic Visits</b>                                                                                                                                                                                                                       | <b>Length of Stay</b>                                                                                                                                                                |
| Self-management                                                                                                                                                                                                                                    | <p>Proportion of patients with visits: N=3 RCTs and 673 patients, RR = 1.03 (0.77, 1.38), I<sup>2</sup>=2%</p> <p>Mean number of visits per patient per month: N=2 RCTs and 192 patients, MD 0.00 (-0.31, 0.31), I<sup>2</sup>=0%</p> | <p>Proportion of patients with admissions: N=12 RCTs and 2475 patients, RR 0.80 (0.71, 0.90), I<sup>2</sup>=0%*</p> <p>Mean number of admissions per patient per month: N=4 RCTs and 900 patients, MD -0.02 (-0.09, 0.06), I<sup>2</sup>=0%</p> | <p>Proportion of patients with visits: N=4 RCTs and 1190 patients, RR 0.78 (0.49, 1.24), I<sup>2</sup>=93%</p> <p>Mean number of visits per patient per month: N=6 RCTs and 1188 patients, MD -0.09 (-0.31, 0.13), I<sup>2</sup> = 79%</p> | <p>Proportion of patients with visits: N/A</p> <p>Mean number of days for admissions per patient per month: N=8 RCTs and 1506 patients, MD -0.29 (-0.76, 0.18), I<sup>2</sup>=0%</p> |
| <p><b>Abbreviations:</b> MD, Mean difference; N, Number of studies; NA, Not Applicable; RCT, Randomized clinical trial; RR, Relative risk.</p> <p>†One study can contribute to more than one strategy</p> <p>*Statistically significant result</p> |                                                                                                                                                                                                                                       |                                                                                                                                                                                                                                                 |                                                                                                                                                                                                                                            |                                                                                                                                                                                      |
